# Supplementary material for: Burden of gastric cancer attributable to Helicobacter pylori in 27 countries from seven geographic regions in 2022
Source: Springer Nature journal article supplement (doi:10.1007/s10120-025-01677-9), 2025-10-20

## Supplementary Materials

### BURDEN OF GASTRIC CANCER ATTRIBUTABLE TO *HELICOBACTER PYLORI* IN 27 COUNTRIES FROM SEVEN GEOGRAPHIC REGIONS IN 2022

Giulia Collatuzzo<sup>1</sup>, Elton Dajti<sup>1</sup>, Matteo Secco<sup>2</sup>, Franco Bazzoli<sup>1</sup>, Paolo Boffetta<sup>1,3,4</sup>, Rocco Maurizio Zagari<sup>1,5</sup>.

<sup>1</sup> Department of Medical and Surgical Sciences, University of Bologna, Bologna, Italy. <sup>2</sup> Gastroenterology and Digestive Endoscopy Unit, Michele e Pietro Ferrero Hospital, Verduno, Cuneo, Italy. <sup>3</sup> Stony Brook Cancer Center, Stony Brook University, Stony Brook, USA. <sup>4</sup> Department of Family, Population and Preventive Medicine, Renaissance School of Medicine, Stony Brook University, Stony Brook, USA. <sup>5</sup> Gastroesophageal Disease Unit, IRCCS - Azienda Ospedaliero-Universitaria di Bologna, Bologna, Italy.

#### Corresponding Author

Rocco Maurizio Zagari, MD, Gastroesophageal Disease Unit, IRCCS – Azienda Ospedaliero-Universitaria di Bologna. Department of Medical and Surgical Sciences, University of Bologna. Via Massarenti, 9. 40138 Bologna, Italy. Email: [roccomaurizio.zagari@unibo.it](mailto:roccomaurizio.zagari@unibo.it)

**Table S1.** Electronic search strategy (up to 1.01.2023).

| Electronic database | Search string                                                                                                                     | Results, n. |
|---------------------|-----------------------------------------------------------------------------------------------------------------------------------|-------------|
| PUBMED              | ((“HP” OR “Helicobacter Pylori” OR “H. Pylori” OR “Campylobacter pylori” OR “Helicobacter pylori” [MeSh Terms]) AND “prevalence”) | 25094       |
| EMBASE              | ((‘HP’ OR ‘Helicobacter pylori’ OR ‘H pylori’ OR ‘Campylobacter pylori’) AND ‘prevalence’)                                        | 10275       |

**Fig. S1.** Flow chart of systematic literature search.

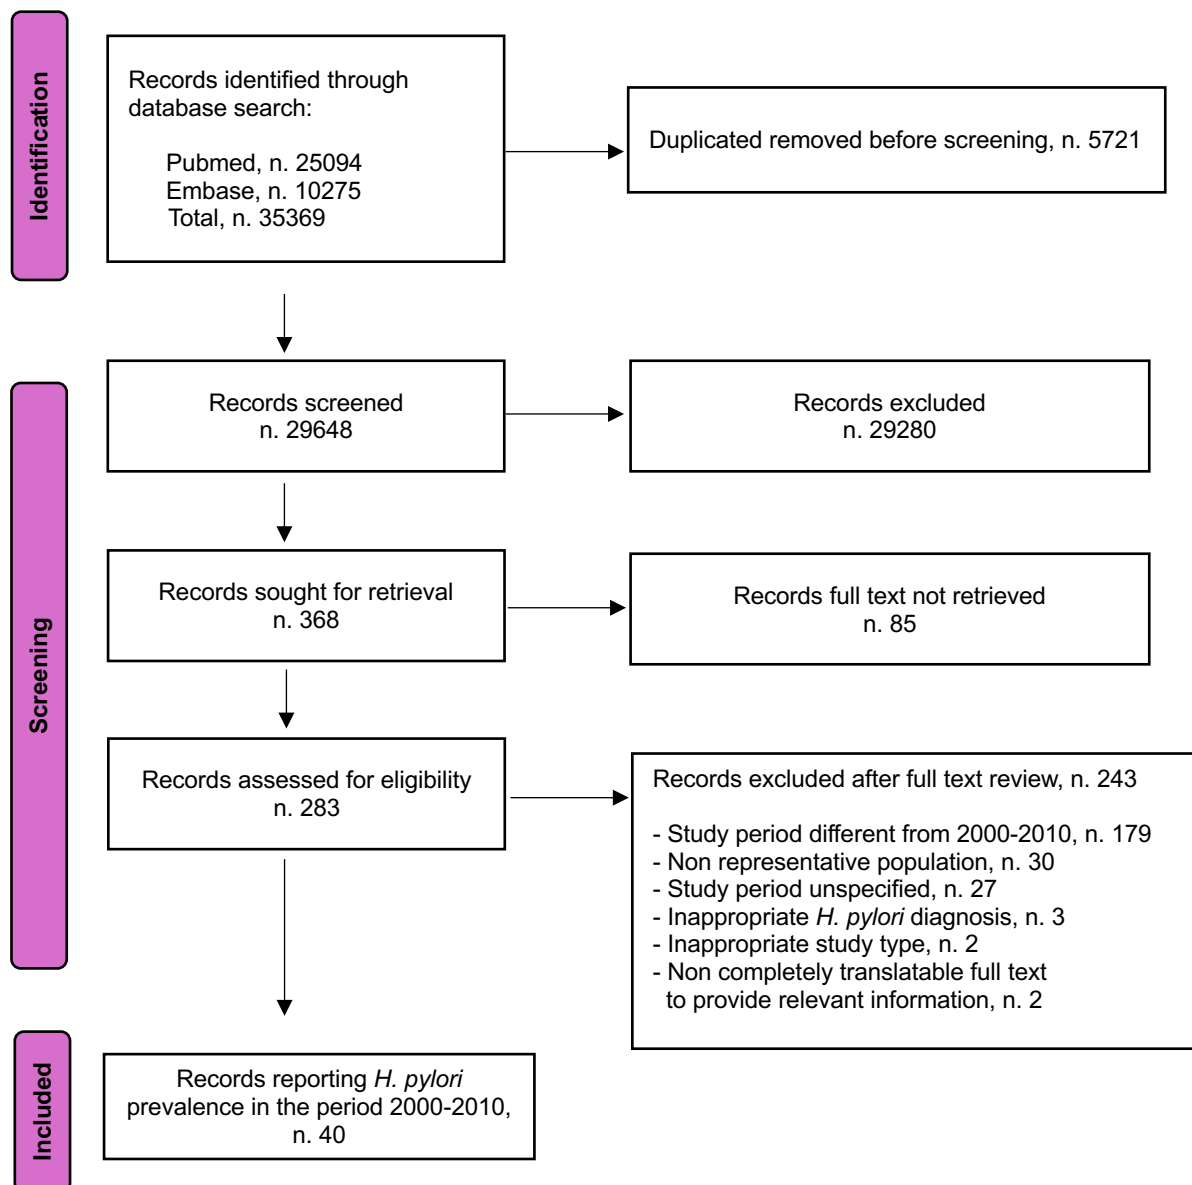

**Table S2.** Characteristics of the studies included in the meta-analysis for *Helicobacter pylori* prevalence in the period 2000-2010.

| Reference                     | Country             | Region                | Study period | Subjects, n. | Age range (years) | <i>H. pylori</i> positive subjects, n. | <i>H.pylori</i> prevalence % | 95% Confidence Interval | <i>H. pylori</i> diagnosis |
|-------------------------------|---------------------|-----------------------|--------------|--------------|-------------------|----------------------------------------|------------------------------|-------------------------|----------------------------|
| Aguemon, B. D. <sup>22</sup>  | Benin               | Africa                | 2003-2004    | 247          | 16-74             | 213                                    | 86.2                         | 70.0-80.9               | Serology                   |
| Dube, C. <sup>23</sup>        | South Africa        | Africa                | 2008         | 228          | 25 ->60           | 216                                    | 94.7                         | 83.3-90.3               | SAT                        |
| Santos, I. S. <sup>24</sup>   | Brazil              | Latin America         | 2006-2007    | 1001         | 18-45             | 708                                    | 70.7                         | 67.9-73.6               | UBT                        |
| Ferreccio, C. <sup>25</sup>   | Chile               | Latin America         | 2003         | 2615         | >17               | 1951                                   | 74.6                         | 72.9-76.2               | Serology                   |
| Sasaki, T. <sup>26</sup>      | Ecuador             | Latin America         | 2007         | 90           | 21- 82            | 65                                     | 72.2                         | 63.0-81.5               | SAT                        |
| Sasaki T. <sup>27</sup>       | Panama              | Latin America         | 2007         | 74           | 21-82             | 40                                     | 54                           | 42.7-65.4               | SAT                        |
| Weill, F. X. <sup>28</sup>    | Guadeloupe (France) | Latin America         | 2000         | 854          | 18-70             | 459                                    | 53.7                         | 51,7-58,8               | Serology                   |
| Cardenas, V. M. <sup>29</sup> | Mexico              | Latin America         | 2004         | 288          | >1                | 110                                    | 38.2                         | 31.7-44.6               | SAT                        |
| Alavi, S. M. <sup>30</sup>    | Iran                | Eastern Mediterranean | 2004-2005    | 96           | 30-60             | 55                                     | 57.3                         | 47.4-67.2               | Serology                   |
| Farshad, S. <sup>31</sup>     | Iran                | Eastern Mediterranean | 2005-2007    | 226          | 18-83             | 94                                     | 41.6                         | 35.2-48.0               | RUT                        |
| Jafarzadeh, A. <sup>32</sup>  | Iran                | Eastern Mediterranean | 2004         | 138          | 17-60             | 101                                    | 73.2                         | 65.8-80.6               | Serology                   |
| Jafarzadeh, A. <sup>33</sup>  | Iran                | Eastern Mediterranean | 2005         | 200          | 20-60             | 135                                    | 67.5                         | 61.0-74.0               | Serology                   |
| Nourai, M. <sup>34</sup>      | Iran                | Eastern Mediterranean | 2005         | 2326         | 18-65             | 1605                                   | 69                           | 67.1-70.9               | Serology                   |

|                                   |                |                       |             |       |         |       |      |           |           |
|-----------------------------------|----------------|-----------------------|-------------|-------|---------|-------|------|-----------|-----------|
| Mansour, K. B. <sup>35</sup>      | Tunisia        | Eastern Mediterranean | 2006-2007   | 250   | 25-55   | 158   | 63.2 | 57.2-69.2 | Serology  |
| Katsanos, K. H. <sup>36</sup>     | Albania        | Europe                | 2005-2008   | 101   | 20 – 50 | 54    | 53.5 | 43.7-63.2 | Histology |
| Katsanos, K. H. <sup>36</sup>     | Greece         | Europe                | 2005-2008   | 101   | 20-50   | 34    | 33.7 | 24.5-42.9 | Histology |
| Bures, J et al. <sup>37</sup>     | Czech Republic | Europe                | 2001        | 2509  | 5-100   | 1046  | 41.7 | 39.8-43.6 | UBT       |
| Kornerup L.S. <sup>38</sup>       | Denmark        | Europe                | 2002 - 2012 | 53633 | >18     | 10552 | 19.7 | 19.3-20.0 | UBT       |
| Holleczeck B. <sup>39</sup>       | Germany        | Europe                | 2000-2002   | 9940  | >18     | 4708  | 47.4 | 46.4-48.3 | Serology  |
| Loffeld L. J. R. F. <sup>40</sup> | Netherland     | Europe                | 1993-2002   | 8190  | 4-99    | 3201  | 39.1 | 38.0-40.1 | Histology |
| Van Blanckestein M. <sup>41</sup> | Netherland     | Europe                | 2005        | 1551  | 17-80   | 491   | 31.7 | 29.4-34.0 | Serology  |
| Asfeldt, A. M. <sup>42</sup>      | Norway         | Europe                | 2004        | 916   | 18-85   | 348   | 38   | 34.9-41.1 | Histology |
| Breckan, R. K. <sup>43</sup>      | Norway         | Europe                | 2004-2005   | 1736  | 18-85   | 368   | 21.2 | 19.3-23.1 | SAT       |
| Celinski, K. <sup>44</sup>        | Poland         | Europe                | 2000-2003   | 585   | 19-89   | 402   | 68.7 | 65.0-72.5 | Serology  |
| Baena Diez, J. M. <sup>45</sup>   | Spain          | Europe                | 1999-2001   | 208   | >20     | 133   | 63.9 | 46.4-58.4 | Serology  |
| Sanchez Ceballos F. <sup>46</sup> | Spain          | Europe                | 2004-2006   | 481   | 4-82    | 290   | 60.3 | 55.9-64.7 | UBT       |
| Cardenas, V. M. <sup>47</sup>     | USA            | North America         | 1999–2000   | 7462  | 3-70    | 2022  | 27.1 | 26.1-28.1 | Serology  |
| Ang, T. L. <sup>48</sup>          | Thailand       | South-East Asian      | 2007–2008   | 179   | 40-80   | 78    | 43.6 | 36.3-50.8 | SAT       |
| Moujaber, T. <sup>49</sup>        | Australia      | Western Pacific       | 2002        | 1811  | >15     | 325   | 17.9 | 13.7-16.6 | Serology  |
| Windsor, H. M. <sup>50</sup>      | Australia      | Western Pacific       | 2003-2004   | 520   | 2-90    | 395   | 76   | 72.3-79.6 | UBT       |
| Chen, J. <sup>51</sup>            | China          | Western Pacific       | 2003        | 1006  | 20-92   | 565   | 56.2 | 44.5-49.6 | Serology  |

|                              |          |                 |             |       |          |       |      |            |                          |
|------------------------------|----------|-----------------|-------------|-------|----------|-------|------|------------|--------------------------|
| Cheng, H. <sup>52</sup>      | China    | Western Pacific | 2003        | 1232  | 2-79     | 577   | 46.8 | 44.0-49.5  | UBT                      |
| Shi, R. <sup>53</sup>        | China    | Western Pacific | 2004 – 2005 | 1371  | 5-100    | 851   | 62.1 | 59.5-64.6  | Serology, UBT            |
| Zhang, D. H. <sup>54</sup>   | China    | Western Pacific | 2006        | 503   | 40-79    | 208   | 41.4 | 37.1-45.7  | SAT                      |
| Zhang, D. H. <sup>54</sup>   | China    | Western Pacific | 2006        | 526   | 40 -79   | 268   | 51   | 46.7-55.2  | Histology                |
| Fujimoto, Y. <sup>55</sup>   | Japan    | Western Pacific | 2002        | 3819  | 17-84    | 2116  | 55.4 | 46.2-58.9  | Serology                 |
| Hirai, I. <sup>56</sup>      | Japan    | Western Pacific | 2007        | 186   | 40 -63   | 75    | 40.3 | 33.3-47.4  | SAT                      |
| Kim, N. <sup>57</sup>        | Korea    | Western Pacific | 2006        | 20154 | 16 ->70  | 12173 | 60.4 | 59.7-61.1  | Serology, histology      |
| Sung.K.C. <sup>58</sup>      | Korea    | Western Pacific | 2001 – 2002 | 58981 | 30 - >60 | 41818 | 70.9 | 70.5-71.3  | Serology, SAT, histology |
| Yim, J.Y. <sup>59</sup>      | Korea    | Western Pacific | 2005        | 8020  | ≥20      | 4780  | 59.6 | 58.5-60.74 | Serology                 |
| Sasidharan, S. <sup>60</sup> | Malaysia | Western Pacific | 2000-2002   | 5370  | 10-70    | 763   | 14.2 | 13.2-15.1  | Serology                 |
| Lin, Y. L. <sup>61</sup>     | Taiwan   | Western Pacific | 2004 – 2006 | 9311  | > 40     | 3650  | 39.2 | 38.3-40.2  | RUT                      |

*H. pylori*: *Helicobacter pylori*; CI: confidence interval; SAT: stool antigen test; UBT: urea breath test; RUT: rapid urease test.

**Table S3.** Quality assessment of selected studies.

| Author (reference)                | Representativeness of the cases* |
|-----------------------------------|----------------------------------|
| Aguemon B.D. <sup>22</sup>        | B                                |
| Dube C. <sup>23</sup>             | B                                |
| Santos I.S. <sup>24</sup>         | B                                |
| Ferreccio C. <sup>25</sup>        | A                                |
| Sasaki T. <sup>26</sup>           | B                                |
| Sasaki T. <sup>27</sup>           | B                                |
| Weill F. <sup>28</sup>            | B                                |
| Cardenas V.M. <sup>29</sup>       | B                                |
| Alavi S.M. <sup>30</sup>          | B                                |
| Farshad S. <sup>31</sup>          | B                                |
| Jafarzadeh A. <sup>32</sup>       | B                                |
| Jafarzadeh A. <sup>33</sup>       | B                                |
| Nouraiie M. <sup>34</sup>         | B                                |
| Mansour K.B. <sup>35</sup>        | B                                |
| Katsanos K.H. <sup>36</sup>       | B                                |
| Bures J. <sup>37</sup>            | A                                |
| Kornerup L.S. <sup>38</sup>       | B                                |
| Holleczeck B. <sup>39</sup>       | B                                |
| Loffeld R.J.L.F. <sup>40</sup>    | B                                |
| van Blankenstein M. <sup>41</sup> | B                                |
| Asfeldt A.M. <sup>42</sup>        | A                                |
| Breckan R.K. <sup>43</sup>        | A                                |
| Celinsky K. <sup>44</sup>         | B                                |
| Baena Diez J.M. <sup>45</sup>     | B                                |
| Sanchez Ceballos F. <sup>46</sup> | B                                |
| Cardenas V.M. <sup>47</sup>       | A                                |
| Ang T.L. <sup>48</sup>            | A                                |
| Moujaber T. <sup>49</sup>         | B                                |
| Windsor H.M. <sup>50</sup>        | B                                |
| Chen J. <sup>51</sup>             | B                                |
| Cheng H. <sup>52</sup>            | B                                |
| Shi R. <sup>53</sup>              | B                                |
| Zhang D.H. <sup>54</sup>          | B                                |
| Fujimoto Y. <sup>55</sup>         | B                                |
| Hirai I. <sup>56</sup>            | B                                |
| Kim N. <sup>57</sup>              | B                                |
| Sung K.C. <sup>58</sup>           | B                                |
| Yim J.Y. <sup>59</sup>            | B                                |
| Sasidharan S. <sup>60</sup>       | B                                |
| Lin Y.I. <sup>61</sup>            | B                                |

\*Representativeness of the cases:

A: Truly representative of the average prevalence of *Helicobacter pylori* infection in the community.

B: Somewhat representative of the average prevalence of *Helicobacter pylori* infection in the community.

C: Selected group of users; e.g. nurses, volunteers.

D: No description of the derivation of the cohort.

**Fig. S2.** Forest plot of the prevalence of *Helicobacter pylori* in the general population in 2000-2010 by country.

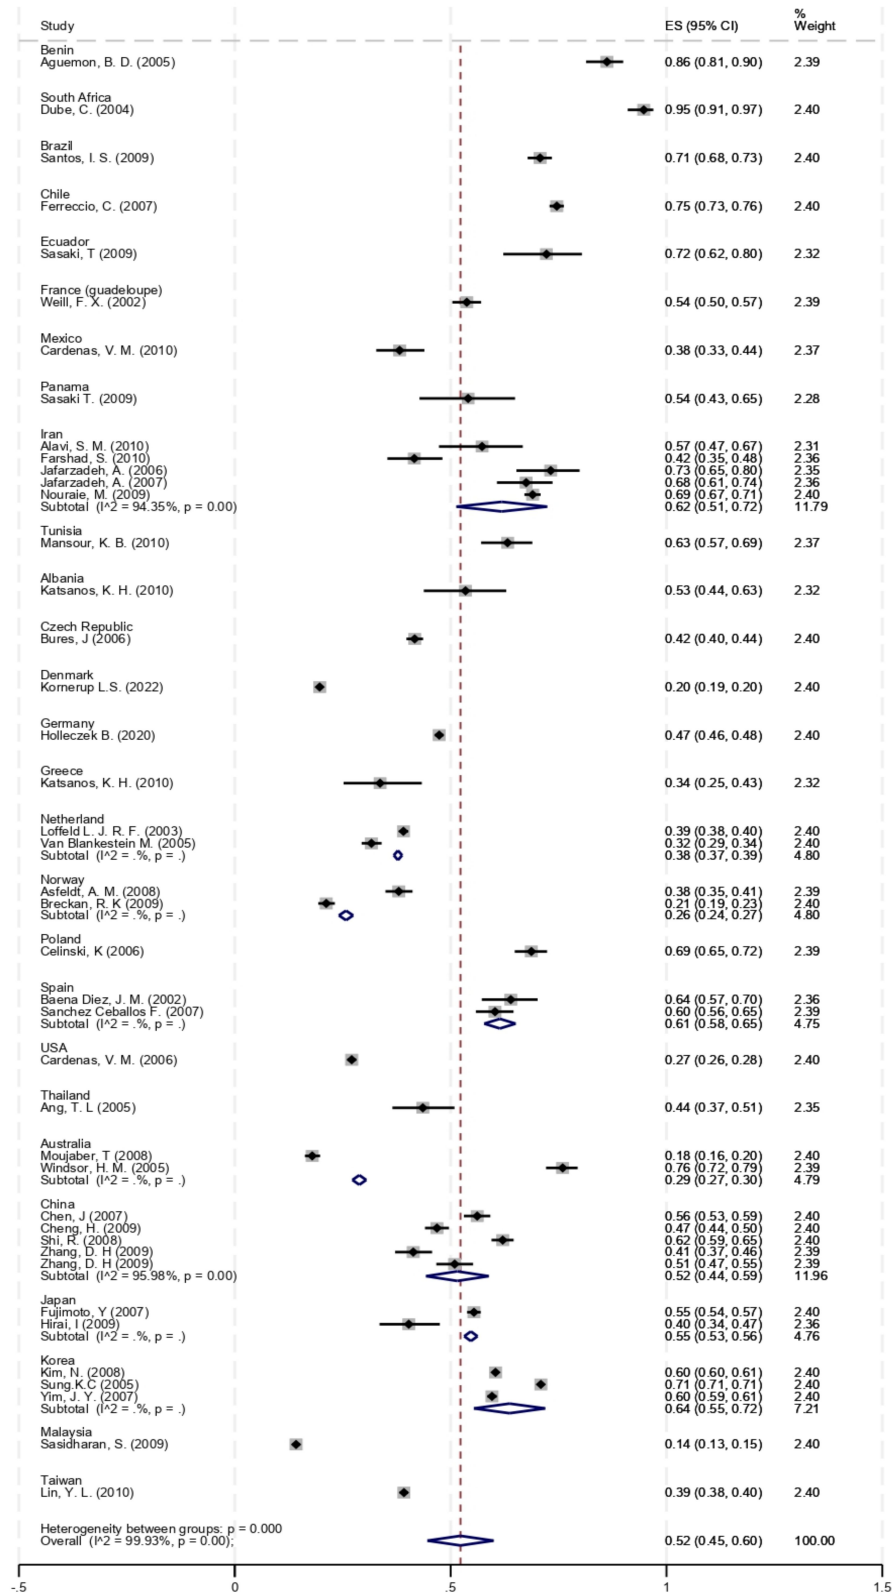

Supplement: MOESM1 [file 10120_2025_1677_MOESM1_ESM.pdf]
